# Supplementary material
Source: HighWire-hosted journal article supplement (https://www.cancerbiomed.org/content/19/5/573)
Supplement: media-1 [file media-1.pdf]

# Supplementary material

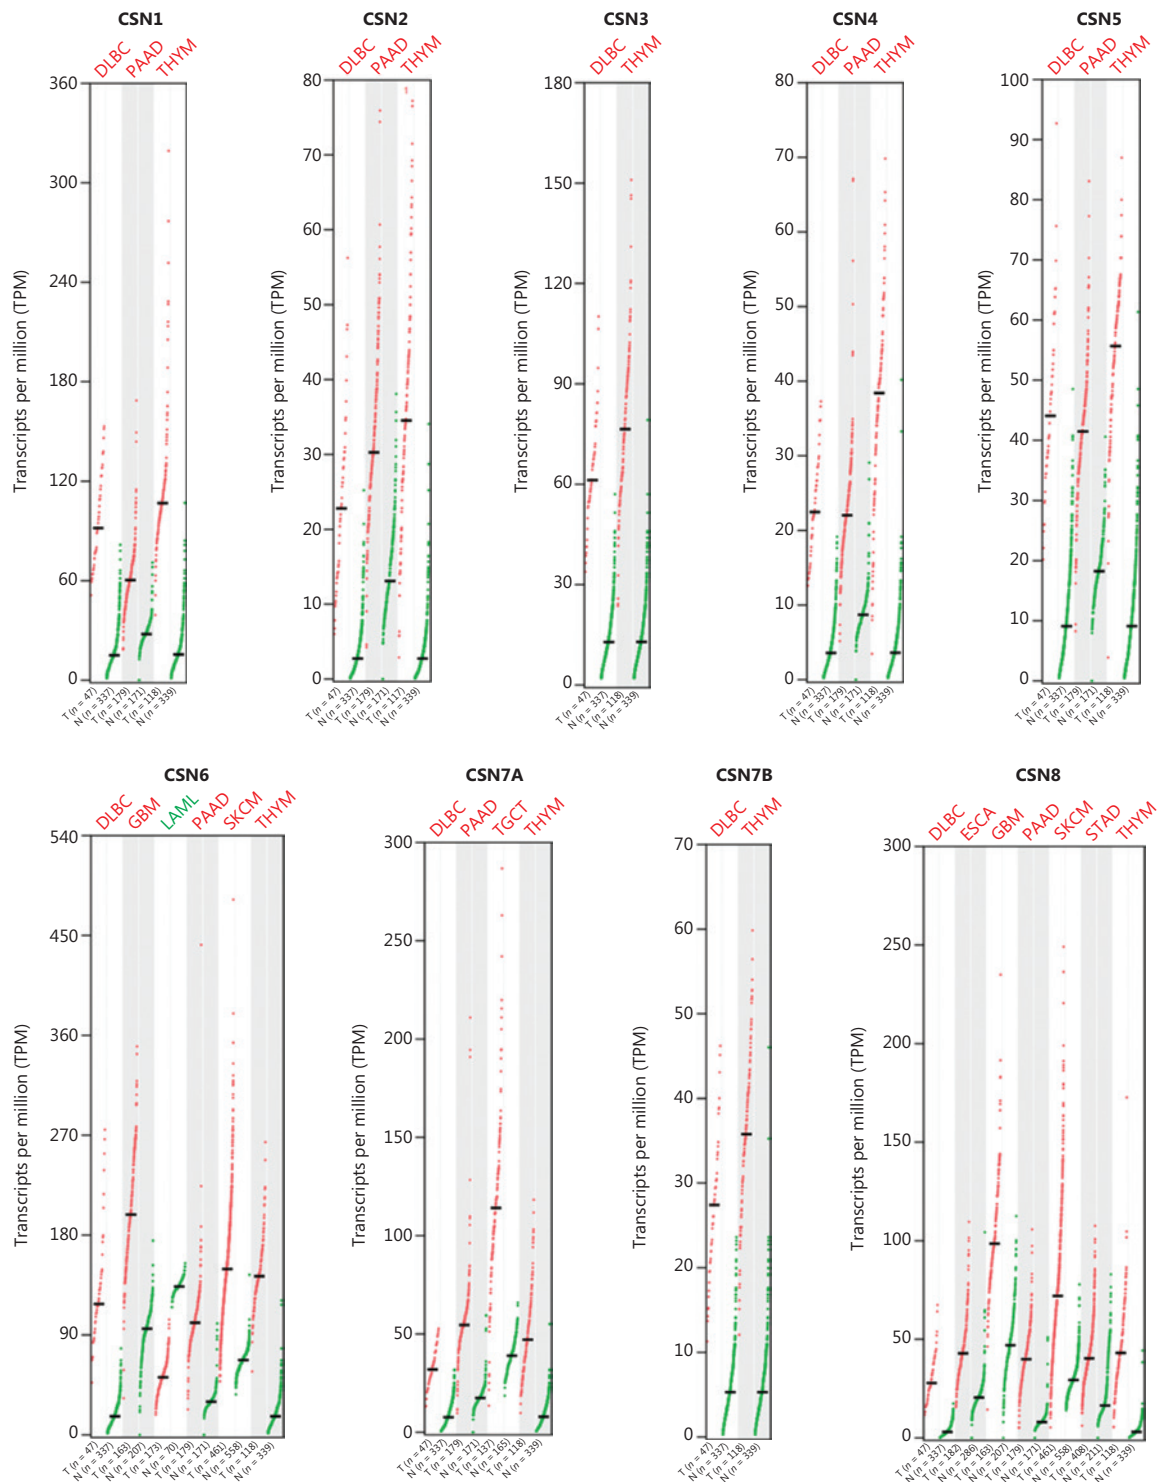

**Supplementary Figure S1** Gene expression profiles across tumor samples (T) and paired normal tissues (N) (dot plot). Each dot represents expression levels of samples. Data were obtained from the GEPIA database. DLBC, lymphoid neoplasm diffuse large B-cell lymphoma; PAAD, pancreatic adenocarcinoma; THYM, thymoma; GBM, glioblastoma multiforme; LAML, acute myeloid leukemia; SKCM, skin cutaneous melanoma; TGCT, testicular germ cell tumors; ESCA, esophageal carcinoma; STAD, stomach adenocarcinoma.
